# Supplementary material for: GenToS: Use of Orthologous Gene Information to Prioritize Signals from Human GWAS
Source: PubMed Central journal article supplement (PMC5017755; doi:10.1371/journal.pone.0162466), 2016-09-09

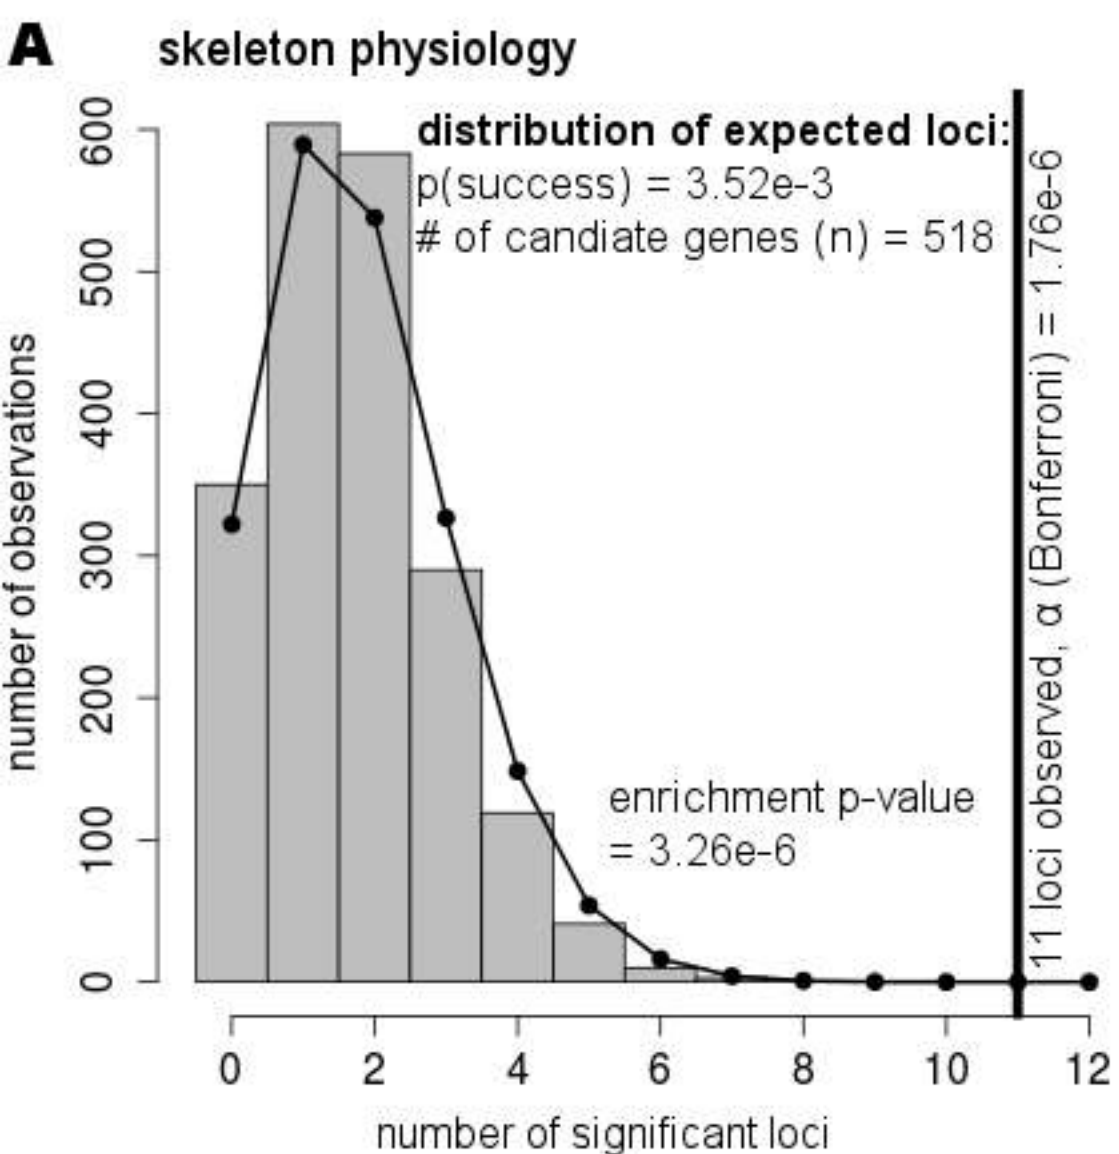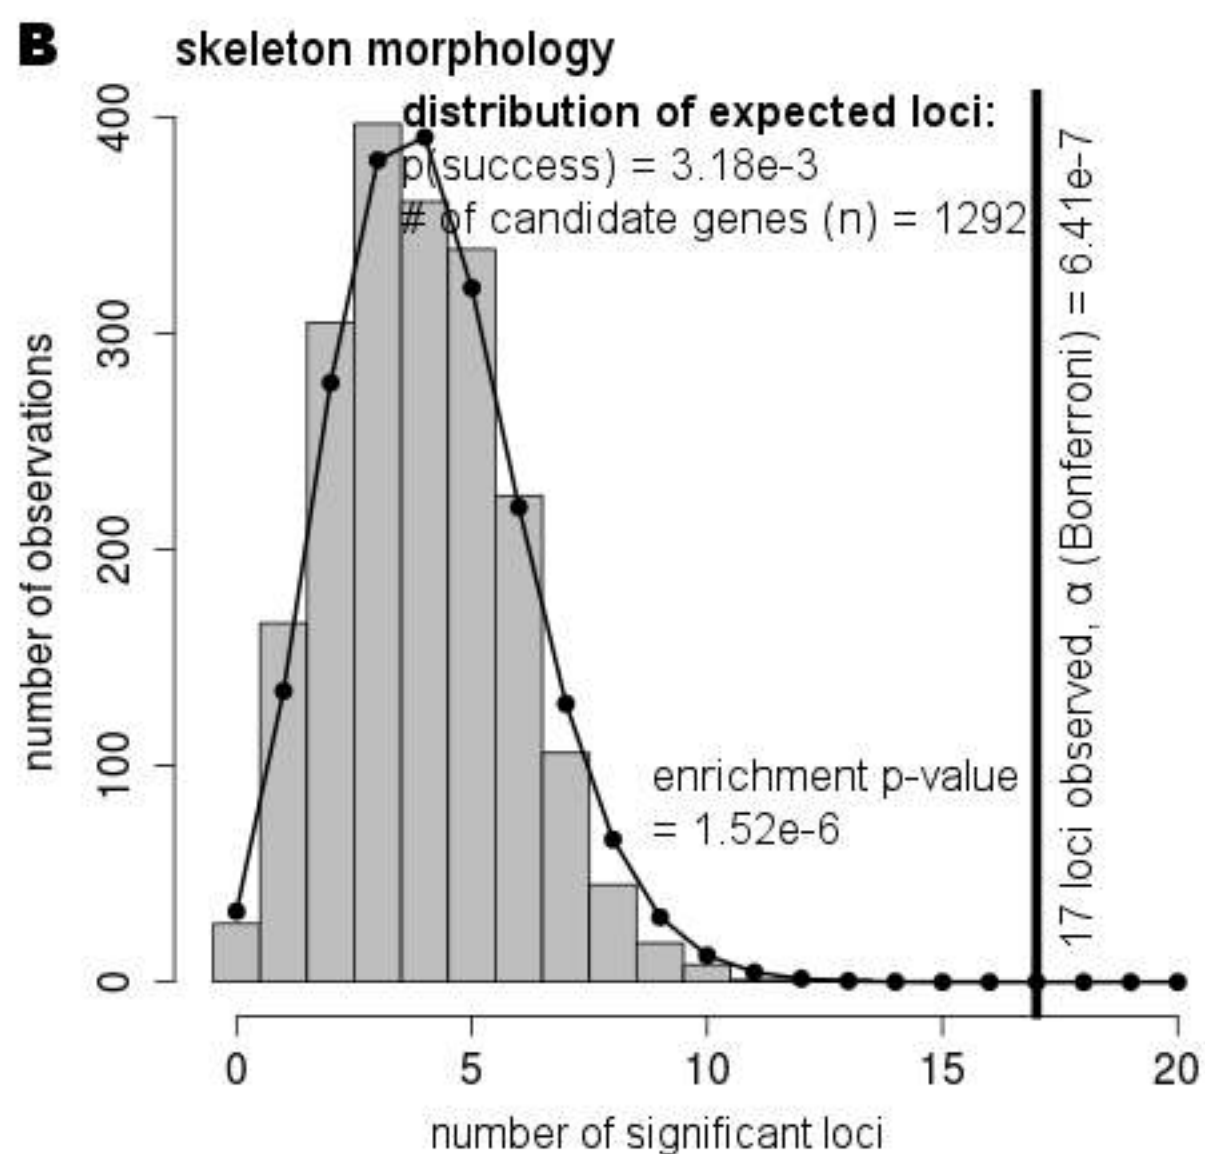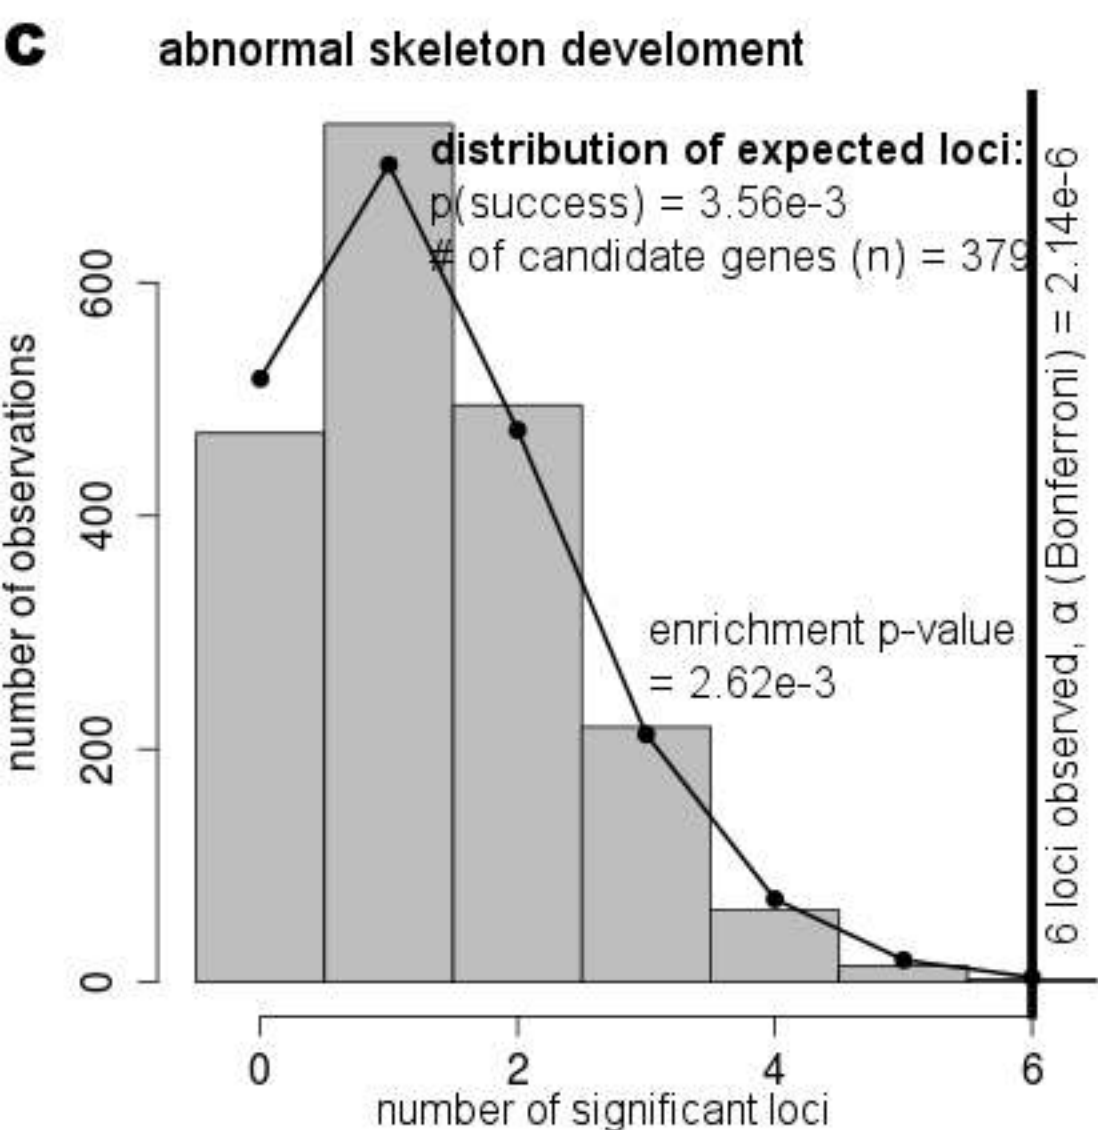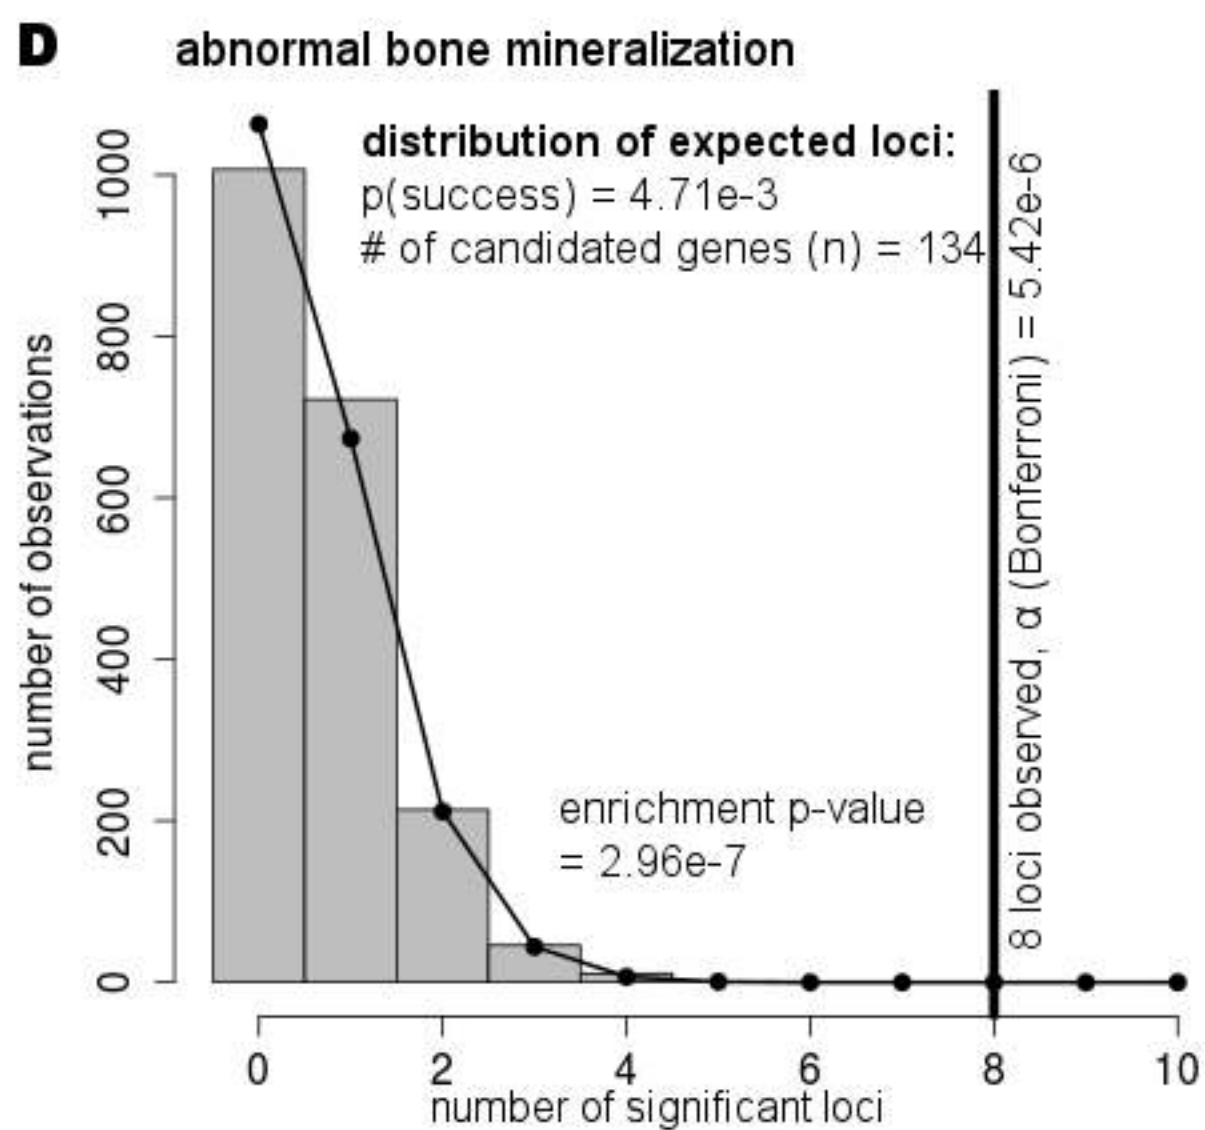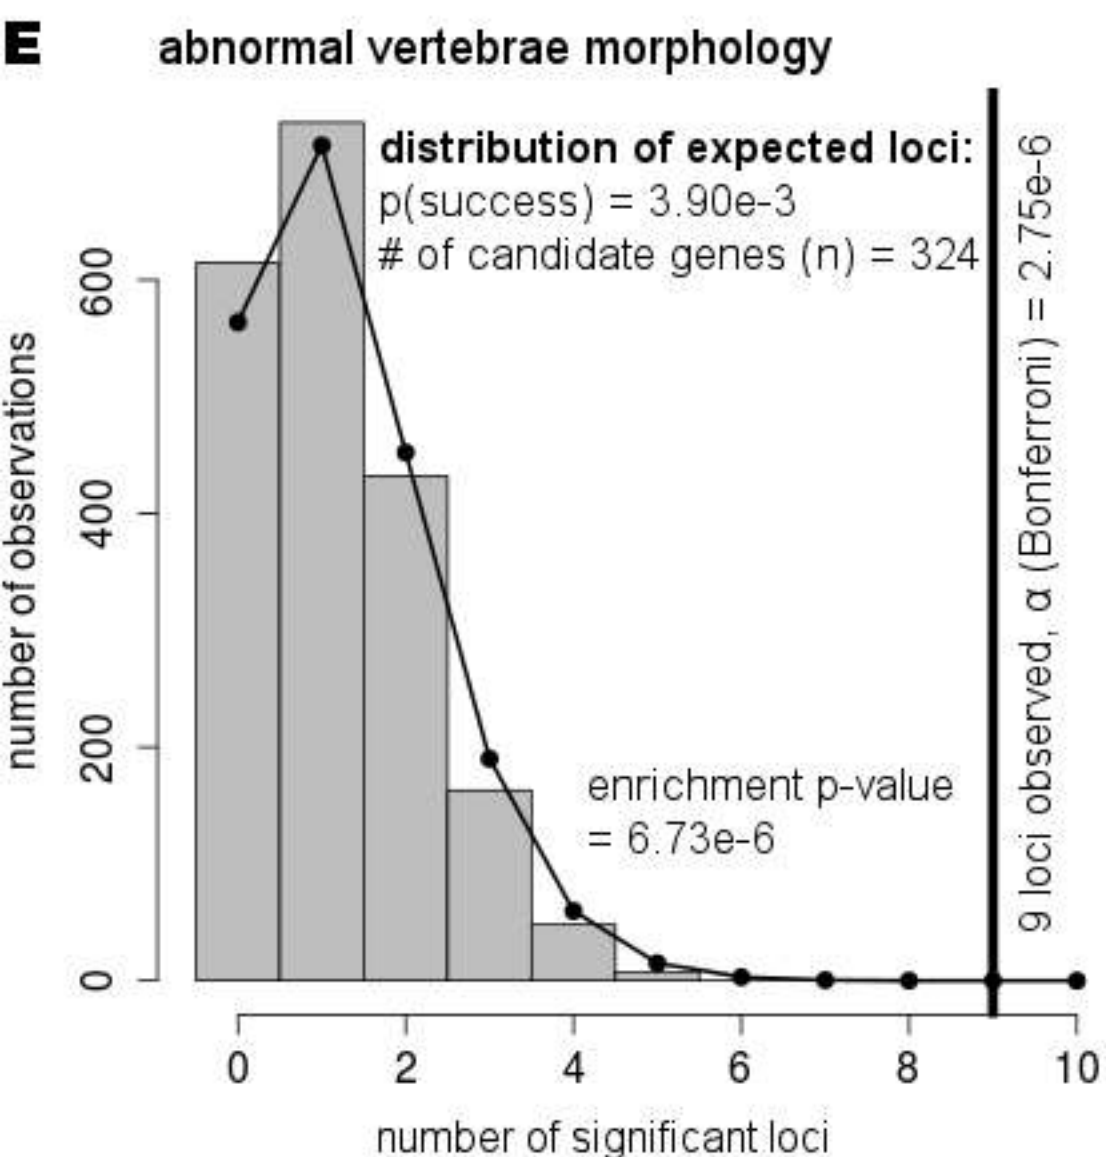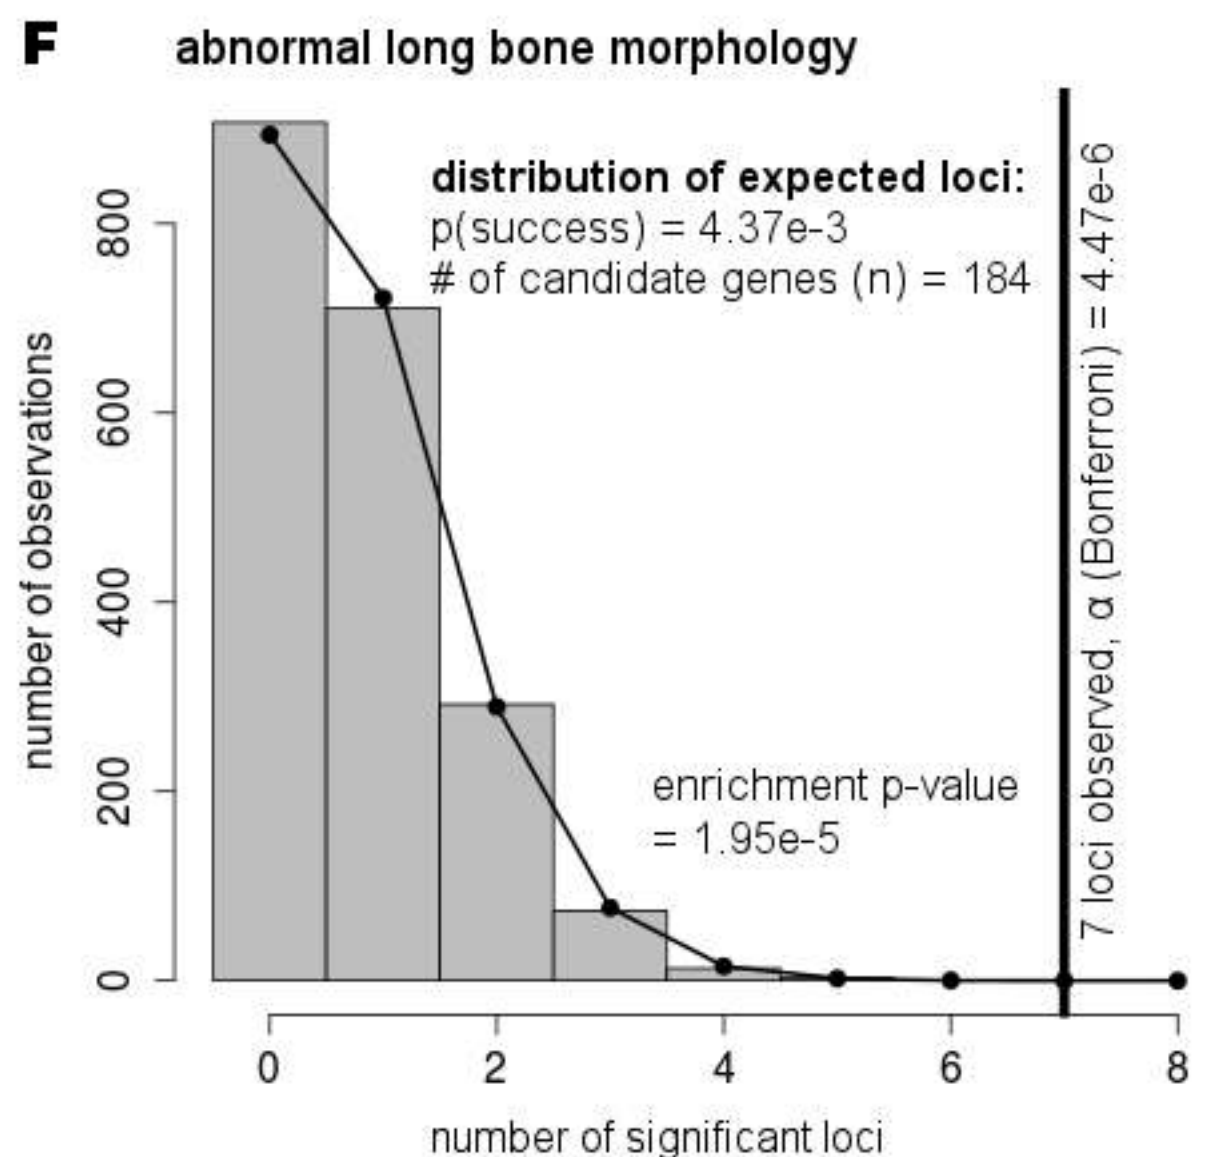

Supplement: pone.0162466.s003.pdf [file pone.0162466.s003.pdf]
