# Supplementary material for: GenToS: Use of Orthologous Gene Information to Prioritize Signals from Human GWAS
Source: PubMed Central journal article supplement (PMC5017755; doi:10.1371/journal.pone.0162466), 2016-09-09
Supplement: pone.0162466.s004.pdf [file pone.0162466.s004.pdf]

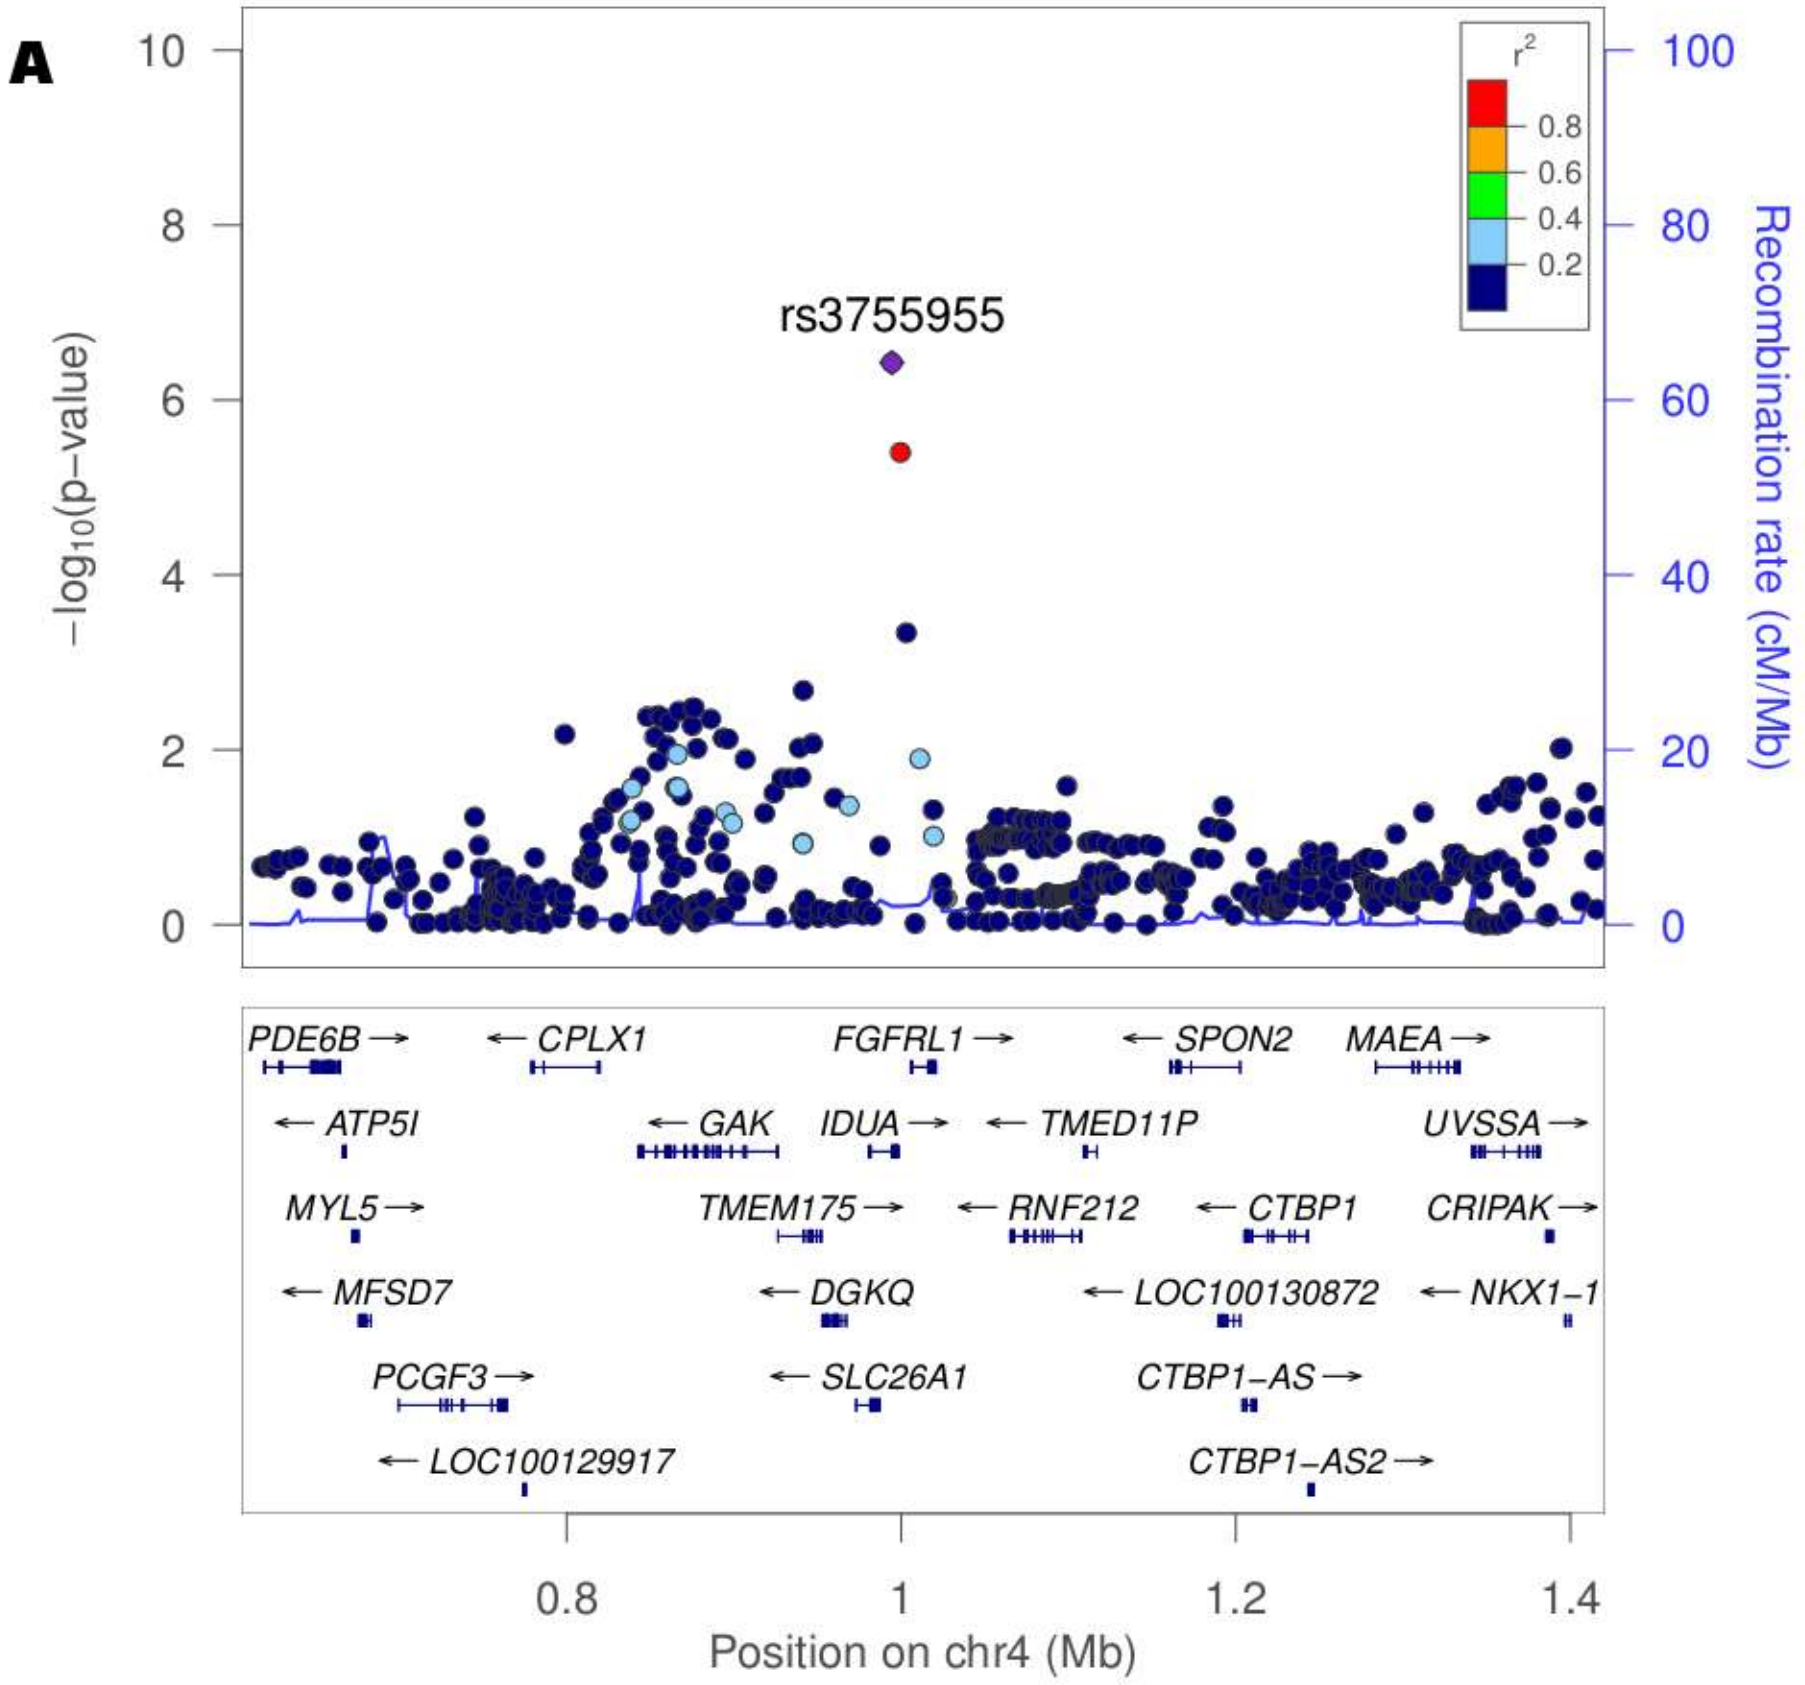

**B**

rs11614913

$r^2$  legend: 0.8 (red), 0.6 (orange), 0.4 (green), 0.2 (blue)

Recombination rate (cM/Mb)

Position on chr12 (Mb)

Gene tracks: HOXC13-AS, HOXC-AS1, FLJ12825, HOXC13, MIR196A2, LOC100240735, HOXC12, HOXC9, LOC100240734, HOTAIR, HOXC8, LOC400043, HOXC11, HOXC6, HOXC-AS3, HOXC4, HOXC10, MIR615, HOXC-AS2, HOXC5

**C**

rs1054629

$r^2$  legend: 0.8 (red), 0.6 (orange), 0.4 (green), 0.2 (blue)

Recombination rate (cM/Mb)

Position on chr4 (Mb)

Gene tracks: HSD17B11, DSPP, IBSP, SPP1, ABCG2, NUDT9, DMP1, MEPE, PKD2, PPM1K, SPARCL1

**D**

rs2070852

$r^2$  legend: 0.8 (red), 0.6 (orange), 0.4 (green), 0.2 (blue)

Recombination rate (cM/Mb)

Position on chr11 (Mb)

Gene tracks: CREB3L1, HARBI1, CKAP5, C11orf49, ACP2, DGKZ, ATG13, LRP4-AS1, ARFGAP2, MIR4688, ARHGAP1, LRP4, PACSIN3, MDK, ZNF408, MIR6745, CHRM4, F2, DDB2, AMBRA1, MIR5582, NR1H3, MIR3160-1, SNORD67, MADD, MIR3160-2, LOC101928943, MYBPC3

1 gene omitted

**E**

rs11809524

$r^2$  legend: 0.8 (red), 0.6 (orange), 0.4 (green), 0.2 (blue)

Recombination rate (cM/Mb)

Position on chr1 (Mb)

Gene track: COL11A1
