# Supplementary material for: GenToS: Use of Orthologous Gene Information to Prioritize Signals from Human GWAS
Source: PubMed Central journal article supplement (PMC5017755; doi:10.1371/journal.pone.0162466), 2016-09-09
Supplement: pone.0162466.s009.pdf [file pone.0162466.s009.pdf]

**Supplementary Table 1:** Genes with significant SNP associations with diabetes, glycemic measures and blood pressure measurements.

| DIAGRAM Diabetes |            |         |                                                                                                  |                                                          |                                                                                                                                                                                                                                                                                              |
|------------------|------------|---------|--------------------------------------------------------------------------------------------------|----------------------------------------------------------|----------------------------------------------------------------------------------------------------------------------------------------------------------------------------------------------------------------------------------------------------------------------------------------------|
| Gene             | index SNP  | P-value | in GWAS Catalog                                                                                  | OMIM number                                              | monogenic phenotype                                                                                                                                                                                                                                                                          |
| <i>HNF1A</i>     | rs12427353 | 1.0E-6  | Other traits                                                                                     | 612520<br>142330<br>600496<br>144700<br>222100<br>125853 | Diabetes mellitus, insulin-dependent, 20<br>Hepatic adenoma, somatic<br>MODY, type III<br>Renal cell carcinoma<br>{Diabetes mellitus, insulin-dependent}<br>{Diabetes mellitus, noninsulin-dependent, 2}                                                                                     |
| <i>WFS1</i>      | rs1801214  | 1.3E-8  | Type 2 diabetes                                                                                  | 222300                                                   | Wolfram syndrome                                                                                                                                                                                                                                                                             |
| <i>PPARG</i>     | rs11709077 | 1.1E-9  | Type 2 diabetes<br>And other traits                                                              | 609338<br>604367<br>604367<br>601665<br><br>125853       | Carotid intimal medial thickness 1<br>Insulin resistance, severe, digenic<br>Lipodystrophy, familial partial, type 3<br>Obesity, severe<br>[Obesity, resistance to]<br>{Diabetes, type 2}                                                                                                    |
| <i>IDE</i>       | rs11187007 | 1.8E-12 | Type 2 diabetes<br>And other traits                                                              |                                                          |                                                                                                                                                                                                                                                                                              |
| <i>KCNJ11</i>    | rs5215     | 4.4E-6  | Type 2 diabetes and other traits                                                                 | 606176<br>610582<br>606176<br>601820<br>616329<br>125853 | Diabetes mellitus, permanent neonatal, with neurologic features<br>Diabetes mellitus, transient neonatal, 3<br>Diabetes, permanent neonatal<br>Hyperinsulinemic hypoglycemia, familial, 2<br>Maturity-onset diabetes of the young, type 13<br>{Diabetes mellitus, type 2, susceptibility to} |
| <i>CDKAL1</i>    | rs7756992  | 1.3E-22 | Type 2 diabetes<br>Diabetes (gestation)<br>Glycated hemoglobin levels<br>And other traits        | 125853                                                   | {Diabetes mellitus, noninsulin-dependent, susceptibility to}                                                                                                                                                                                                                                 |
| <i>FTO</i>       | rs17817449 | 5.6E-11 | other traits                                                                                     | 612938<br>612460                                         | Growth retardation, developmental delay, facial dysmorphism<br>{Obesity, susceptibility to, BMIQ14}                                                                                                                                                                                          |
| <i>SLC30A8</i>   | rs3802177  | 2.1E-11 | Glycolated hemoglobin levels<br>And other traits                                                 | 125853                                                   | {Diabetes mellitus, noninsulin-dependent, susceptibility to}                                                                                                                                                                                                                                 |
| <i>TCF7L2</i>    | rs7901695  | 2.5E-65 | Type 2 diabetes<br>Glycated hemoglobin levels<br>Proinsulin levels<br>Two-hour glucose challenge | 125853                                                   | {Diabetes mellitus, type 2, susceptibility to}                                                                                                                                                                                                                                               |

| <b>MAGIC fasting insulin</b>        |                  |                |                                                                                                  |                                      |                                                                                                                                                             |
|-------------------------------------|------------------|----------------|--------------------------------------------------------------------------------------------------|--------------------------------------|-------------------------------------------------------------------------------------------------------------------------------------------------------------|
| <b>Gene</b>                         | <b>index SNP</b> | <b>P-value</b> | <b>in GWAS Catalog</b>                                                                           | <b>OMIM number</b>                   | <b>monogenic phenotype</b>                                                                                                                                  |
| <i>IGF1</i>                         | rs35767          | 9.58E-005      | Fasting insulin related traits<br>Fasting glucose related traits<br>And other traits             | 608747                               | Growth retardation with deafness and mental retardation due to IGF1 deficiency                                                                              |
| <b>MAGIC fasting glucose</b>        |                  |                |                                                                                                  |                                      |                                                                                                                                                             |
| <b>Gene</b>                         | <b>index SNP</b> | <b>P-value</b> | <b>in GWAS Catalog</b>                                                                           | <b>OMIM number</b>                   | <b>monogenic phenotype</b>                                                                                                                                  |
| <i>G6PC2</i>                        | rs560887         | 4.61E-75       | Fasting plasma glucose<br>Glycated hemoglobin levels                                             |                                      |                                                                                                                                                             |
| <i>GCK</i>                          | rs1799884        | 6.36E-37       | Fasting plasma glucose<br>Glycated hemoglobin levels                                             | 125853<br>606176<br>602485<br>125851 | Diabetes mellitus, noninsulin-dependent, late onset<br>Diabetes mellitus, permanent neonatal<br>Hyperinsulinemic hypoglycemia, familial, 3<br>MODY, type II |
| <i>GCKR</i>                         | rs780093         | 2.91E-10       | Hyperglyceridemia<br>And other traits                                                            | 613463                               | [Fasting plasma glucose level QTL 5]                                                                                                                        |
| <i>SLC2A2</i>                       | rs11920090       | 1.87E-6        | Fasting glucose related traits<br>And other traits                                               | 227810<br>125853                     | Fanconi-Bickel syndrome<br>{Diabetes mellitus, noninsulin-dependent}                                                                                        |
| <i>SLC30A8</i>                      | rs11558471       | 2.62E-8        | Glycolated hemoglobin levels<br>And other traits                                                 | 125853                               | {Diabetes mellitus, noninsulin-dependent, susceptibility to}                                                                                                |
| <i>TCF7L2</i>                       | rs4506565        | 1.24E-5        | Type 2 diabetes<br>Glycated hemoglobin levels<br>Proinsulin levels<br>Two-hour glucose challenge | 125853                               | {Diabetes mellitus, type 2, susceptibility to}                                                                                                              |
| <i>WFS1</i>                         | rs10012946       | 4.17E-7        | Type 2 diabetes                                                                                  | 222300                               | Wolfram syndrome                                                                                                                                            |
| <b>ICBP systolic blood pressure</b> |                  |                |                                                                                                  |                                      |                                                                                                                                                             |
| <b>Gene</b>                         | <b>index SNP</b> | <b>P-value</b> | <b>in GWAS Catalog</b>                                                                           | <b>OMIM number</b>                   | <b>monogenic phenotype</b>                                                                                                                                  |
| <i>ADM</i>                          | rs1450266        | 1.56E-6        | Diastolic blood pressure<br>Systolic blood pressure                                              |                                      |                                                                                                                                                             |
| <i>NPPA</i>                         | rs5068           | 1.86E-7        | Systolic blood pressure                                                                          | 612201<br>615745                     | Atrial fibrillation, familial, 6<br>Atrial standstill 2                                                                                                     |
| <i>NPR3</i>                         | rs1173747        | 7.38E-7        | Blood pressure<br>And other traits                                                               |                                      | ?Hypertension, salt-resistant                                                                                                                               |
| <i>PTPN11</i>                       | rs11066320       | 4.56E-8        | Blood pressure<br>Hematological parameters<br>And other traits                                   | 151100<br>607785<br>156250<br>163950 | LEOPARD syndrome 1<br>Leukemia, juvenile myelomonocytic, somatic<br>Metachondromatosis<br>Noonan syndrome 1                                                 |
